# Supplementary material
Source: PubMed Central journal article supplement (PMC6395554)
Supplement: NIHMS1505882-supplement-1.pdf [file NIHMS1505882-supplement-1.pdf]

**Supplementary Figure 1. Naltrexone blocks ketamine's antidepressant effect on multiple rating scales.** Time-course of ancillary outcome measures (mean  $\pm$  SD) for ketamine-responsive TRD patients (n=7) in two crossed over conditions, ketamine + naltrexone (K+N) and ketamine + placebo (K+P). Treatments delivered on Day 0 following first questionnaire. K+N group scores were significantly higher than K+P group scores on Day 1 post infusion for both MADRS (**A**), BDI-2 (**B**).

**Supplementary Figure 2. Naltrexone consistently blocks ketamine's antidepressant effect when removing the cross-over component of the trial.** Time-course of primary outcome measures (mean  $\pm$  SD) for all patients receiving at least one infusion (N=14), including 2 patients who withdrew from the study following the first infusion. This analysis differs from that shown in **Fig. 2** and **Fig. 3** in that only the first infusion is considered, eliminating confounds of cross-over design. On the first infusion, N=9 patients received K+P and N=5 patients received K+N. Treatments delivered on Day 0 following first questionnaire. **A.** HDRS6 time-course. Analysis of between-group HDRS6 differences on Day 1 shows that K+N group scores were

significantly higher than K+P group scores, with the latter group demonstrating expected post-infusion HDRS6 score reduction. **B.** HDRS17 time-course, demonstrating qualitatively similar results as in **A.**

**Supplementary Figure 3. Visual Analog Scale (VAS) scores after naltrexone or placebo, but before ketamine infusion, do not differ between groups.** Oral placebo (PBO) or naltrexone (NAL) was given 45 minutes to 1 hour before infusion. VAS scores for a variety of subjective effects were obtained 5 minutes prior to the initiation of infusion. Data is shown for all crossed-over patients (N=12, mean + SD). VAS scores do not differentiate which pretreatment a patient received.

### Ketamine responders (N=7)

● K+P ● K+N

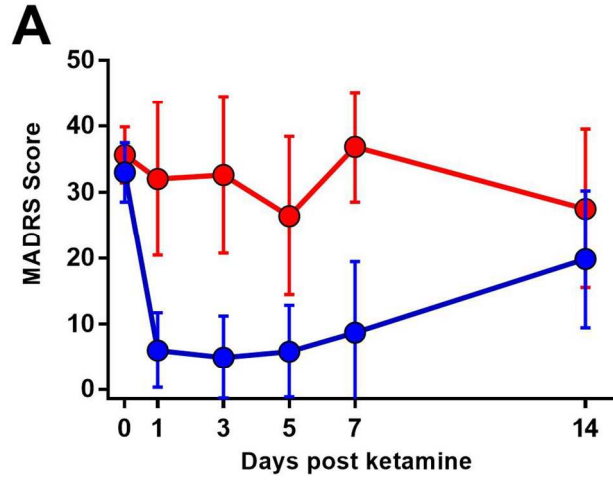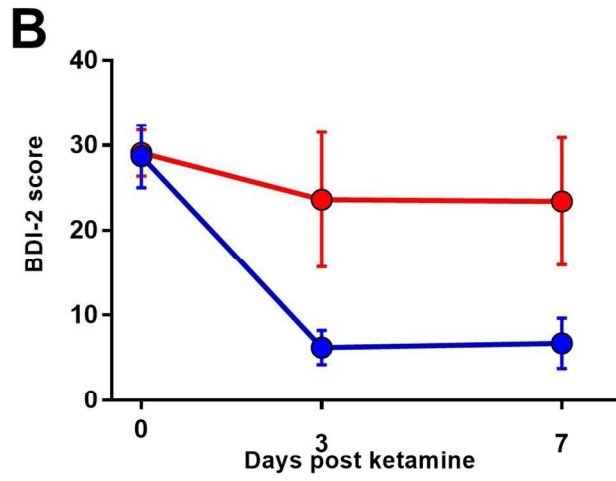

97x154mm (300 x 300 DPI)

**All infused patients (N=14)**

● K+P, N=9 ● K+N, N=5

**A**

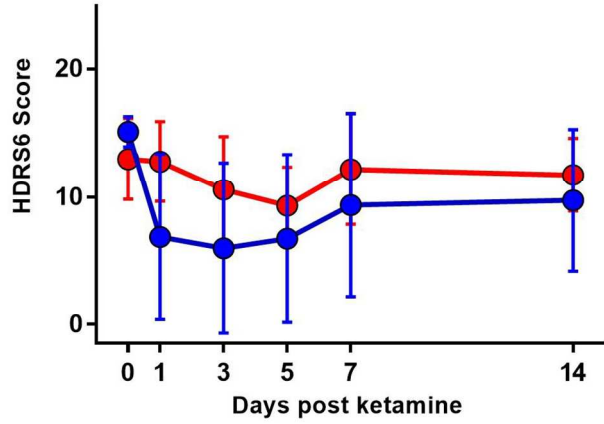

**B**

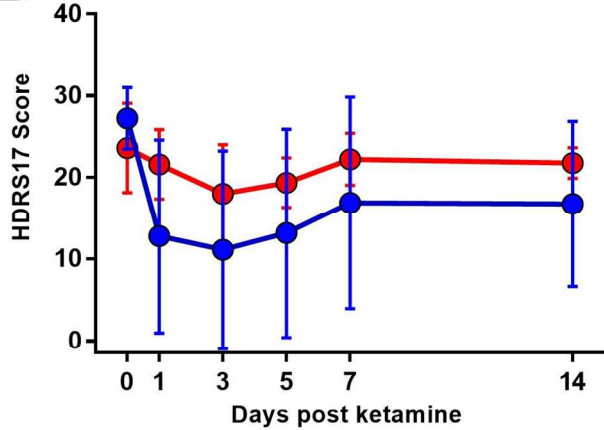

97x155mm (300 x 300 DPI)

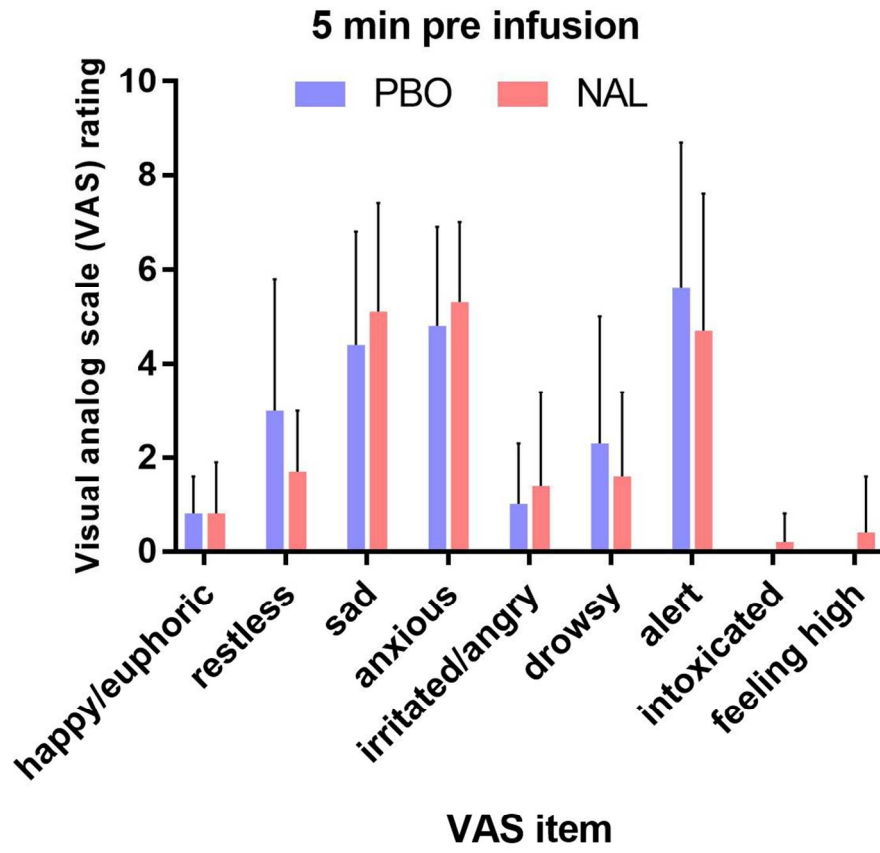

107x102mm (300 x 300 DPI)
